# Supplementary material for: Functional Connectome Prediction of Anxiety Related to the COVID-19 Pandemic
Source: Atypon-hosted journal article supplement (doi:10.1176/appi.ajp.2020.20070979), 2021-04-26
Supplement: appi.ajp.2020.20070979.ds001.pdf [file appi.ajp.2020.20070979.ds001.pdf]

 


Psychiatry Online
